# Supplementary material for: How to force a classical chelating ligand to a metal non-chelating bridge: the observation of a rare coordination mode of diethanolamine in the 1D complex {[Cu2(Piv)4(H3tBuDea)](Piv)}n
Source: Royal Society of Chemistry journal article supplement (doi:10.1039/c3ce41657g), 2013-11-13
Supplement: c3ce41657g.pdf [file c3ce41657g.pdf]

## Electronic Supplementary Information (ESI)

How to Force a Classical Chelating Ligand to a Metal Non-Chelating  
Bridge: the Observation of a Rare Coordination Mode of Diethanolamine  
in the 1D Complex  $\{[\text{Cu}_2(\text{Piv})_4(\text{H}_3t\text{BuDea})](\text{Piv})\}_n$

*Oksana V. Nesterova,<sup>a</sup> Marina V. Kirillova,<sup>a</sup> M. Fátima C. Guedes da Silva,<sup>a,b</sup> Roman Boča,<sup>c,d</sup> and  
Armando J. L. Pombeiro<sup>a\*</sup>*

<sup>a</sup>Centro de Química Estrutural, Complexo I, Instituto Superior Técnico, The University of Lisbon,  
Avenida Rovisco Pais, 1049-001 Lisbon, Portugal

<sup>b</sup>Universidade Lusófona de Humanidades e Tecnologias, Campo Grande 376, 1749-024 Lisbon,  
Portugal

<sup>c</sup>Department of Chemistry, FPV, University of SS Cyril and Methodius, Trnava, Slovakia

<sup>d</sup>Institute of Inorganic Chemistry, FCHPT, Slovak University of Technology, Radlinskeho 9, 812  
37 Bratislava, Slovakia

AUTHOR EMAIL ADDRESS: pombeiro@ist.utl.pt

**Table S1.** Selected geometrical parameters (distances/Å and angles/°) for **1**.

|                                        |            |                                        |            |
|----------------------------------------|------------|----------------------------------------|------------|
| Cu1–O1                                 | 2.159(2)   | Cu2–O2                                 | 2.192(2)   |
| Cu1–O11                                | 1.961(3)   | Cu2–O31                                | 1.957(3)   |
| Cu1–O12 <sup>a</sup>                   | 1.957(3)   | Cu2–O32 <sup>b</sup>                   | 1.974(3)   |
| Cu1–O21                                | 1.950(3)   | Cu2–O41                                | 1.951(3)   |
| Cu1–O22 <sup>a</sup>                   | 1.969(3)   | Cu2–O42 <sup>b</sup>                   | 1.945(3)   |
| Cu1…Cu1 <sup>a</sup>                   | 2.5776(8)  | Cu2…Cu2 <sup>b</sup>                   | 2.5959(8)  |
| O1–Cu1–O11                             | 91.11(10)  | O2–Cu2–O31                             | 94.74(10)  |
| O1–Cu1–O12 <sup>a</sup>                | 99.31(10)  | O2–Cu2–O32 <sup>b</sup>                | 95.96(10)  |
| O1–Cu1–O21                             | 93.58(10)  | O2–Cu2–O41                             | 93.02(10)  |
| O1–Cu1–O22 <sup>a</sup>                | 96.94(10)  | O2–Cu2–O42 <sup>b</sup>                | 97.69(10)  |
| O11–Cu1–O12 <sup>a</sup>               | 169.56(11) | O31–Cu2–O32 <sup>b</sup>               | 169.28(11) |
| O11–Cu1–O21                            | 89.70(12)  | O31–Cu2–O41                            | 89.95(13)  |
| O11–Cu1–O22 <sup>a</sup>               | 89.50(12)  | O31–Cu2–O42 <sup>b</sup>               | 89.66(13)  |
| O12 <sup>a</sup> –Cu1–O21              | 90.27(12)  | O32 <sup>b</sup> –Cu2–O41              | 88.82(12)  |
| O12 <sup>a</sup> –Cu1–O22 <sup>a</sup> | 88.62(12)  | O32 <sup>b</sup> –Cu2–O42 <sup>b</sup> | 89.57(12)  |
| O21–Cu1–O22 <sup>a</sup>               | 169.45(11) | O41–Cu2–O42 <sup>b</sup>               | 169.28(11) |

Symmetry transformations used to generate equivalent atoms: <sup>a</sup>  $-x, -y, 2-z$ ; <sup>b</sup>  $1-x, -y, 2-z$ .

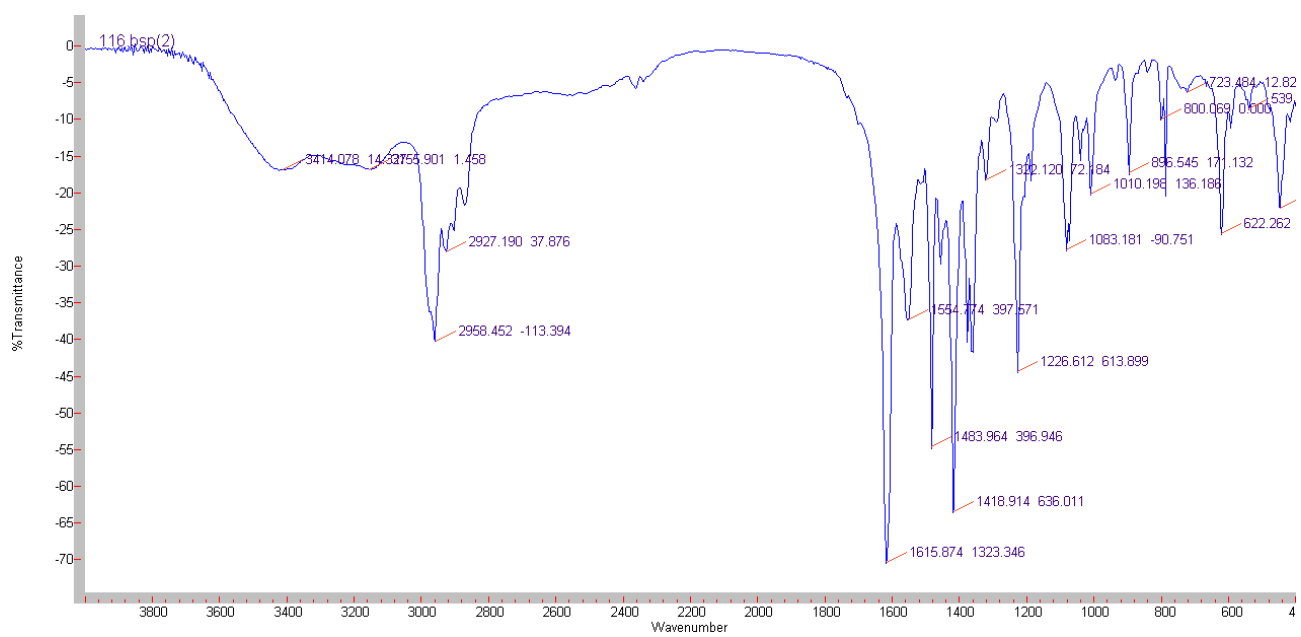

Figure S1. IR spectrum of **1** (in KBr).

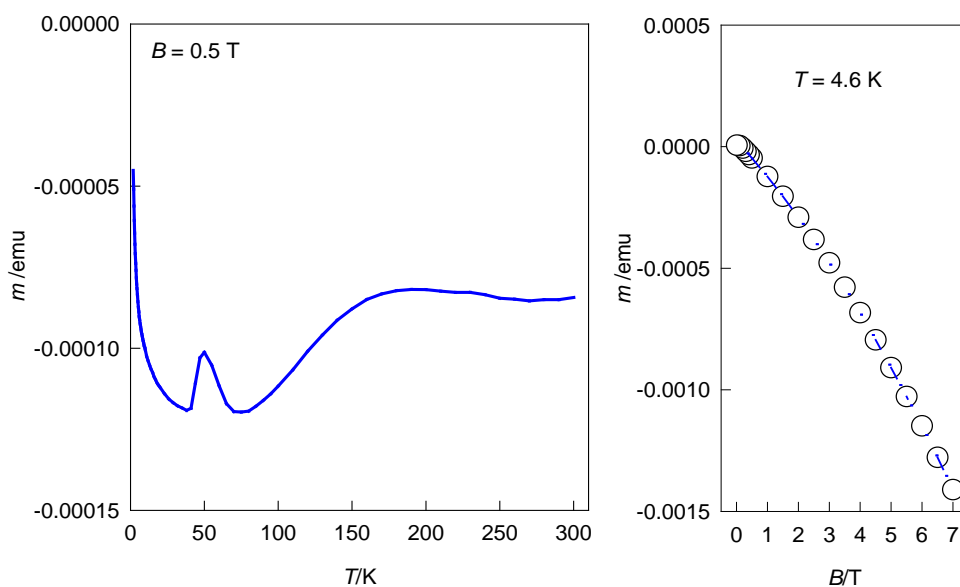

**Figure S2.** Raw magnetic data for **1**: left – temperature dependence of the magnetic moment of the specimen; right – field dependence of the magnetic moment.

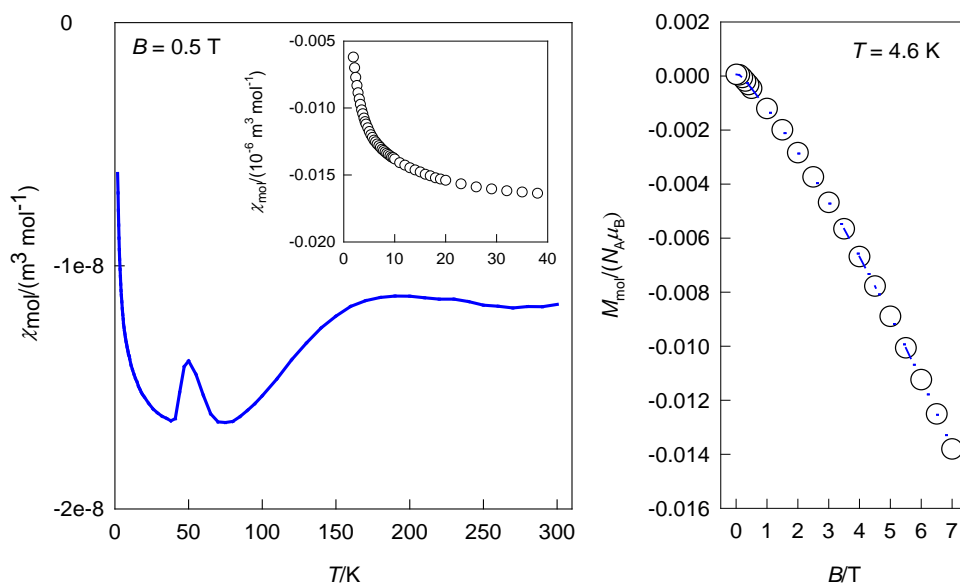

**Figure S3.** Magnetic data for **1**: left – temperature dependence of the molar magnetic susceptibility; right – field dependence of the magnetization per formula unit. Estimate of the net diamagnetic contribution is  $\chi_{\text{dia}} = -(5 \cdot M_r) \cdot 10^{-9}$ ; using  $M_r = 794.94/1000$  one gets  $\chi_{\text{dia}} = -3.97 \times 10^{-9} \text{ m}^3 \text{ mol}^{-1}$  (SI units are applied). A temperature-independent paramagnetic correction is  $\chi_{\text{TIP}} = +2 \cdot 0.75 \times 10^{-9} \text{ m}^3 \text{ mol}^{-1}$ .

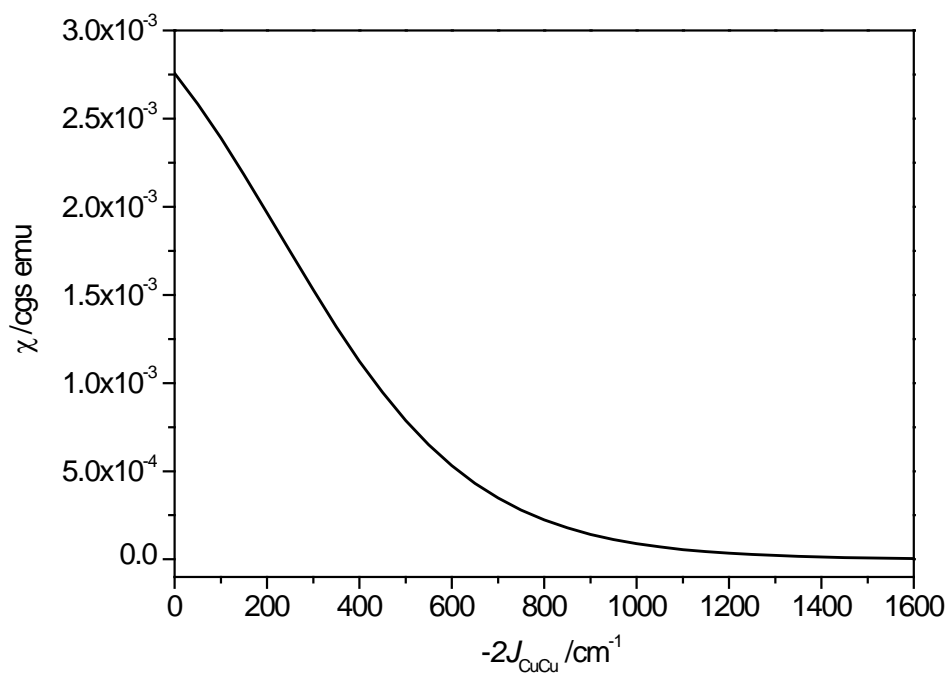

**Figure S4.** The dependence of the molar magnetic susceptibility (per two copper centres) on the exchange coupling constant  $J_{\text{CuCu}}$  calculated from the Bleaney–Bowers equation. The magnitude of  $\chi$  becomes neglectable only for  $|J| \gg 1000 \text{ cm}^{-1}$ .
